# Supplementary material for: Testing the palindromic target site model for DNA transposon insertion using the Drosophila melanogaster P-element
Source: PubMed Central journal article supplement — Nucleic Acids Res. 2008 Oct 1;36(19):6199–208. doi: 10.1093/nar/gkn563 (PMC2577343; doi:10.1093/nar/gkn563), 2008-10-01
Supplement: gkn563_1.pdf [file gkn563_1.pdf]

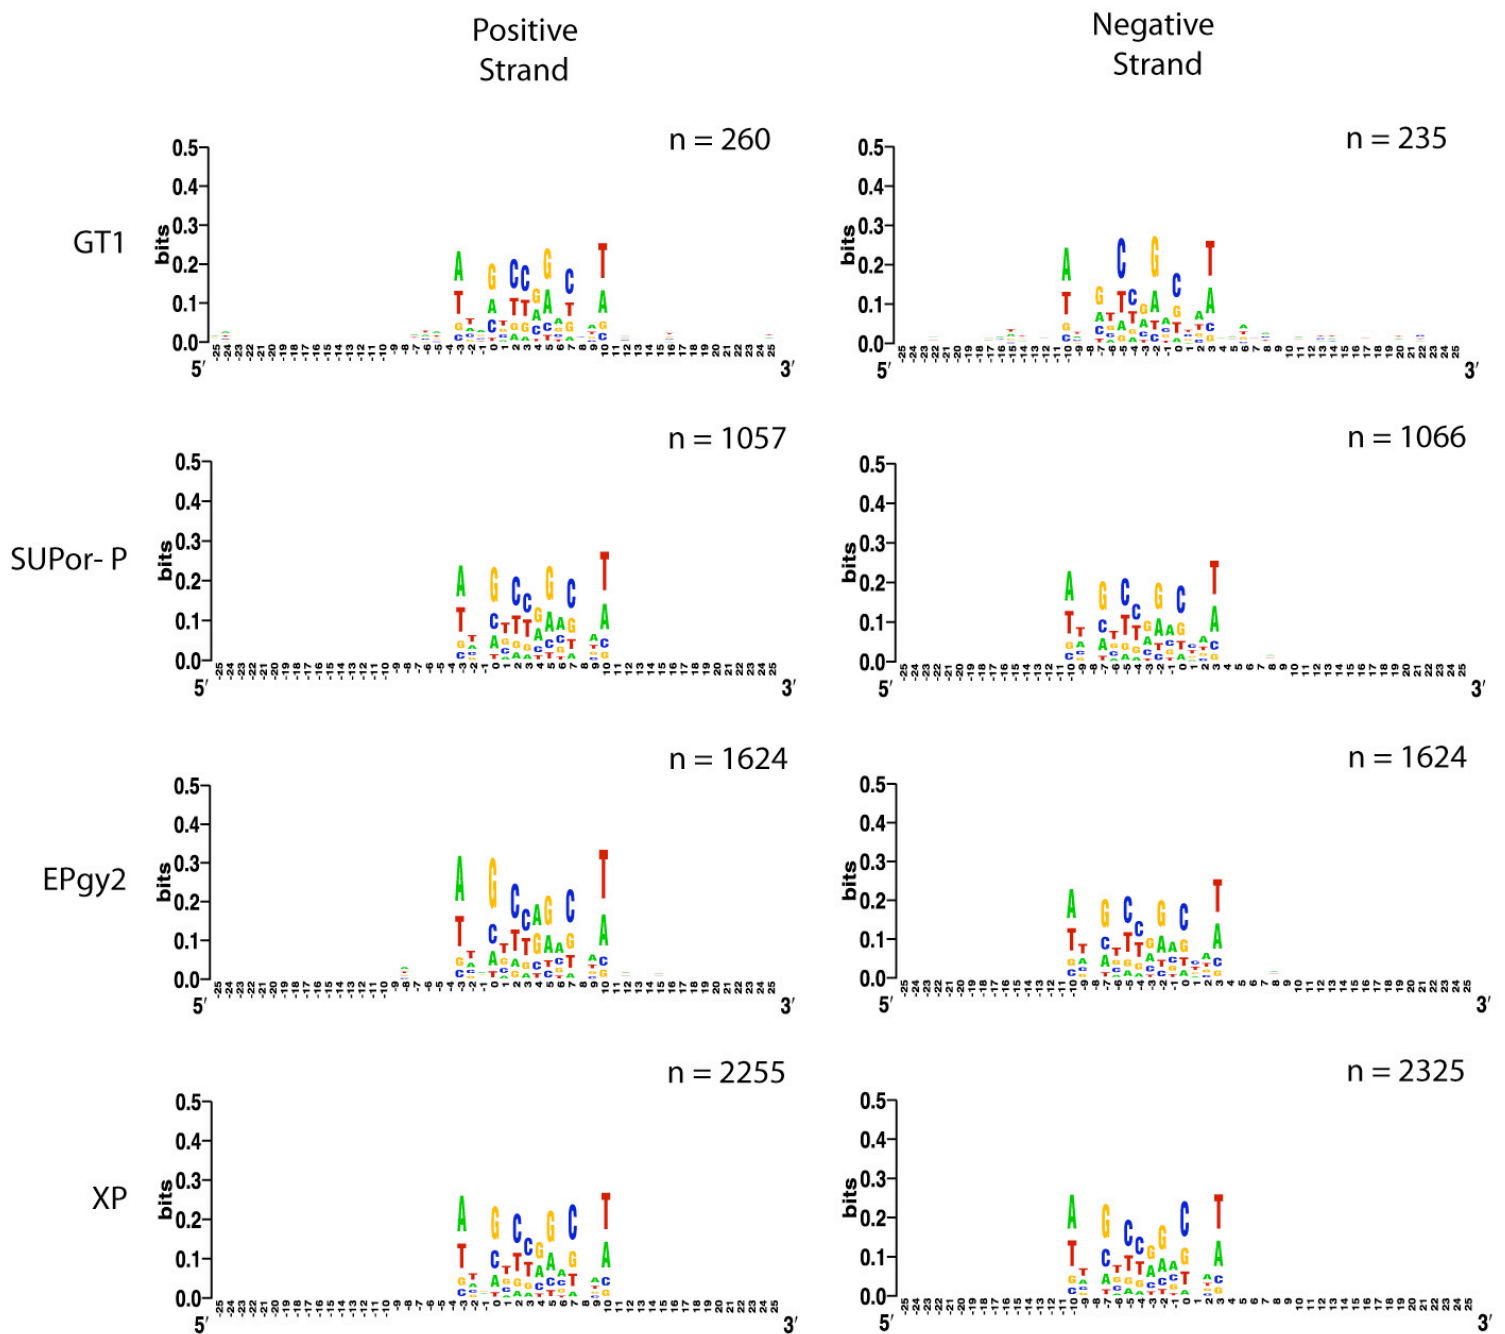

**Supplemental File 2. Sequence logos for the GT1, SUPor-P, EPgy2 and XP P-element families.** Numbers reported are for the nonredundant set of insertion sites on the positive and negative strand used to construct the sequence logo. Note numbers of nonredundant insertion sites for each family do not sum to the total number of nonredundant insertion sites for the pooled dataset of all four families reported in the main text.
