# Supplementary material for: Testing the palindromic target site model for DNA transposon insertion using the Drosophila melanogaster P-element
Source: PubMed Central journal article supplement — Nucleic Acids Res. 2008 Oct 1;36(19):6199–208. doi: 10.1093/nar/gkn563 (PMC2577343; doi:10.1093/nar/gkn563), 2008-10-01
Supplement: gkn563_2.pdf [file gkn563_2.pdf]

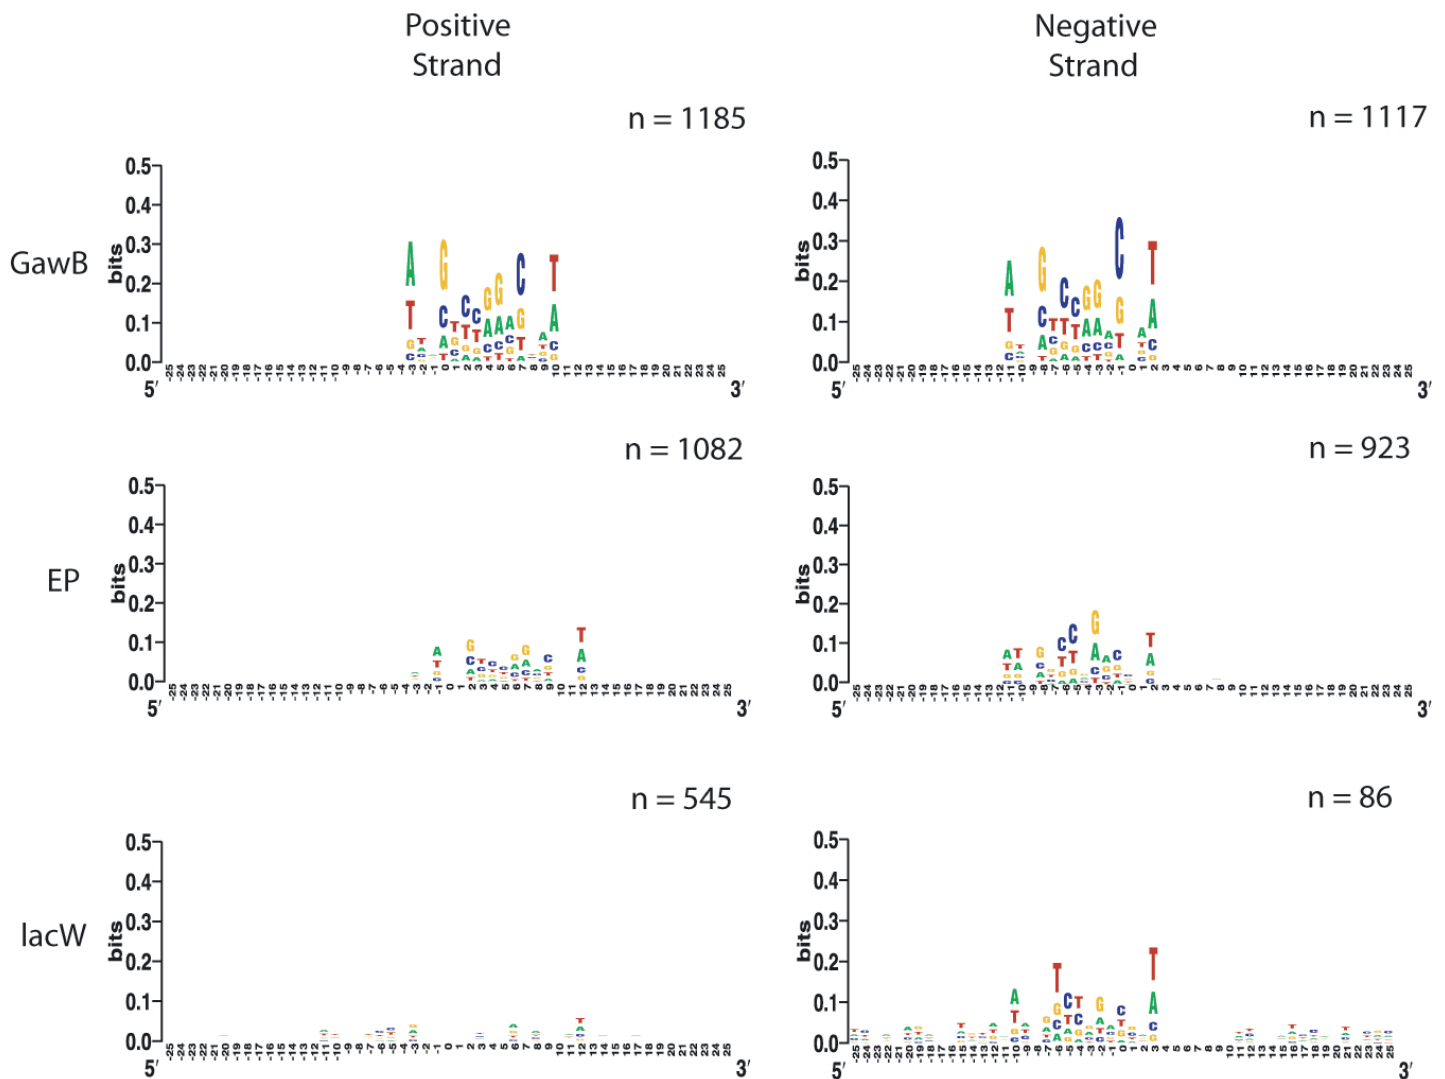

**Supplemental File 4. Sequence logos for the GawB, EP and lacW P-element families.** Numbers reported are for the nonredundant set of insertion sites on the positive and negative strand used to construct the sequence logo. We note that total numbers of nonredundant insertion sites for each family include sites that have insertions for other P-element families and therefore do not equal the number of family-specific insertion sites reported in the main text.
